# Supplementary material for: Isolation and identification of an antioxidant collagen peptide from skipjack tuna (Katsuwonus pelamis) bone
Source: Royal Society of Chemistry journal article supplement (doi:10.1039/c9ra04665h), 2019-01-01
Supplement: c9ra04665h1.pdf [file c9ra04665h1.pdf]

Supplementary material for:

**Isolation and identification of an antioxidant collagen peptide from skipjack tuna (*Katsuwonus pelamis*) bone**

**Ding Ding<sup>&</sup>, Bowei Du<sup>&</sup>, Chao Zhang, Fakhar Zaman, Yaqin Huang\***

Beijing Laboratory of Biomedical Materials, Beijing Key Laboratory of Electrochemical Process and Technology for Materials, Beijing University of Chemical Technology, Beijing 100029, People's Republic of China.

\*Corresponding Author:

Tel: +86-10-64438266; Fax: +86-10-64438266;

E-mail address: huangyq@mail.buct.edu.cn

<sup>&</sup>These authors contributed equally to this work and should be considered co-first authors.

**Table S1** The degree of hydrolysis, enzymolysis conditions and antioxidant activities of skipjack tuna bone collagen hydrolysates. Results are reported as mean values  $\pm$  SD.

| Collagen peptide | Protease* | DH (%)            | Enzymolysis conditions |       |                   | DPPH radical                                 |
|------------------|-----------|-------------------|------------------------|-------|-------------------|----------------------------------------------|
|                  |           |                   | pH                     | T(°C) | Reaction Time (h) | scavenging activity IC <sub>50</sub> (mg/mL) |
| STCH-TC          | TC        | 16.28 $\pm$ 0.074 | 8.0                    | 40    | 2                 | 4.211 $\pm$ 0.11 <sup>a</sup>                |
| STCH-T+C         | T+C       | 15.29 $\pm$ 0.074 | 8.0                    | 40    | 2+2               | 5.549 $\pm$ 0.07 <sup>b</sup>                |
| STCH-C+T         | C+T       | 15.35 $\pm$ 0.028 | 8.0                    | 40    | 2+2               | 5.428 $\pm$ 0.29 <sup>b</sup>                |

\* In this work, E:S (E represents enzyme, and S represents substrate) ratio for trypsin and chymotrypsin is 0.5 % (w/w) and 0.1 % (w/w), respectively

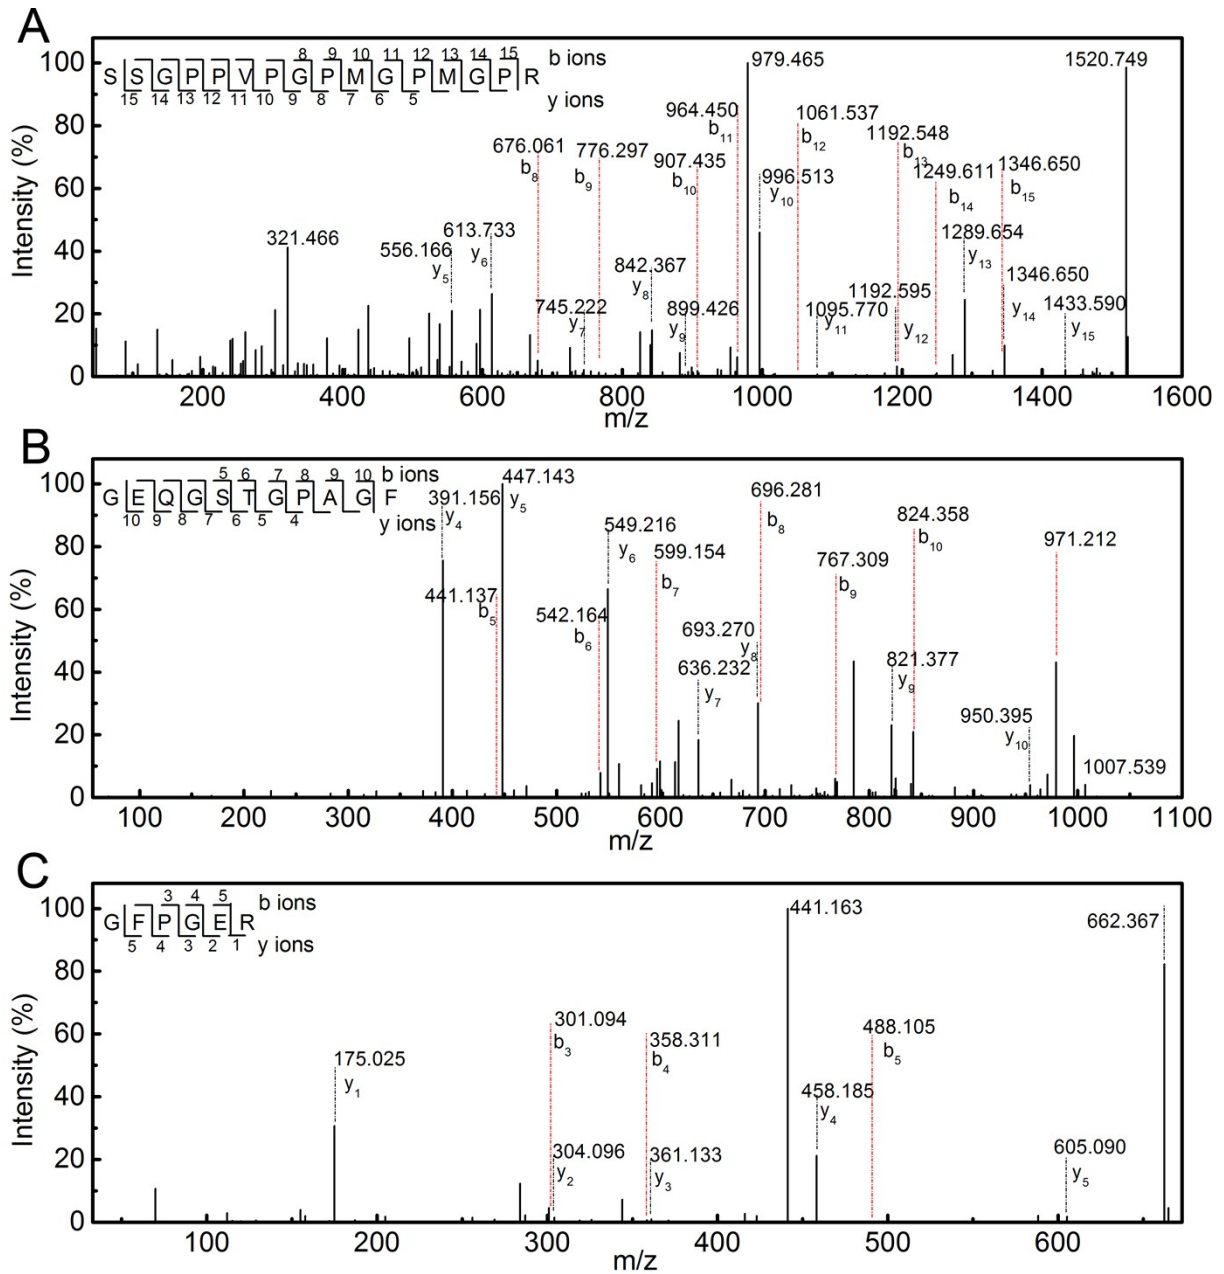

**Fig. S1** Identification of the amino acid sequence using MALDI-TOF/TOF mass spectrometry. (A) SSGPPVPMGMGPR; (B) GEQGSTGPAGF; (C) GFPGER.

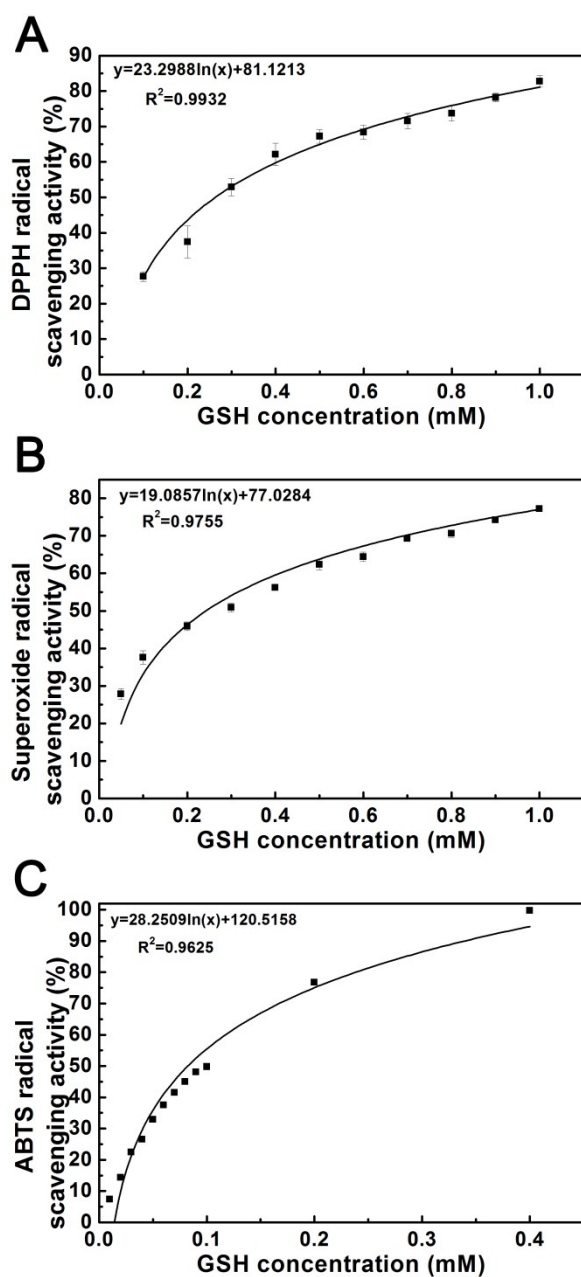

**Fig. S2** Antioxidant activities of the GSH. (A) The GSH (0-1.0mM) was used as the standard of DPPH radical; (B) The GSH (0-1.0mM) was used as the standard of superoxide radical; (C) The GSH (0-0.4mM) was used as the standard of ABTS radical.

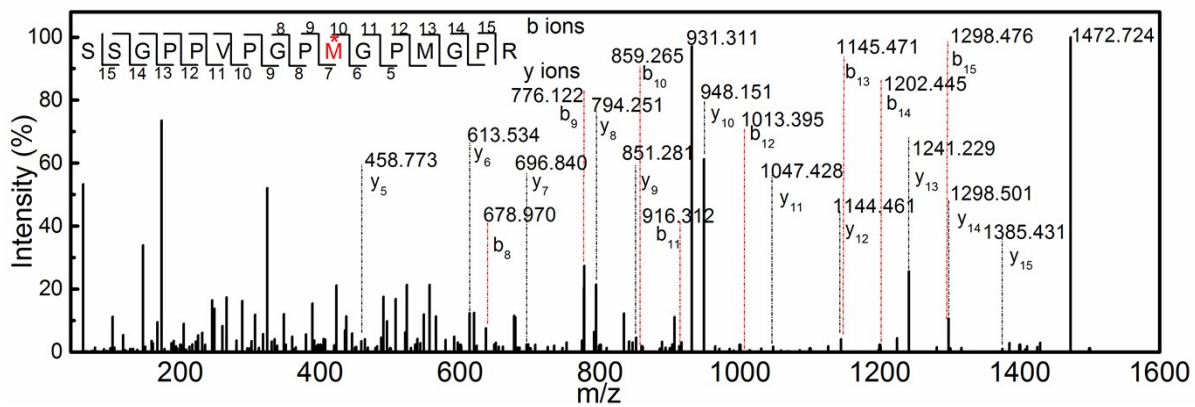

**Fig. S3** The MALDI-TOF/TOF mass spectrometry of SSGPPVPGPMGPMGPR after reaction with DPPH radical.

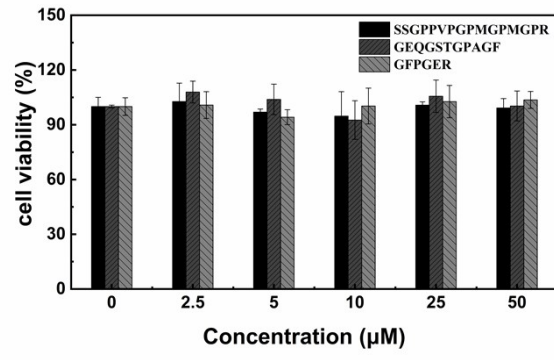

**Fig.S4** Effects of the peptides on cytotoxicity in HepG2 cells.

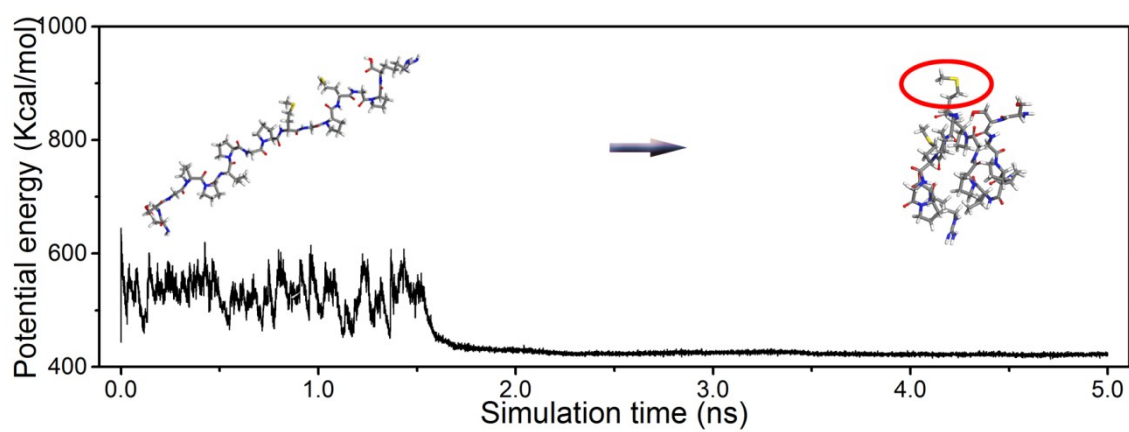

**Fig. S5** The time evolution of the potential energy of the system including one peptide of SSGPPVPGPMGPMGPR and one DPPH radical.
